# Supplementary material
Source: MDPI journal article supplement (https://www.mdpi.com/1999-4907/14/4/672)
Supplement: s1 [file s1]

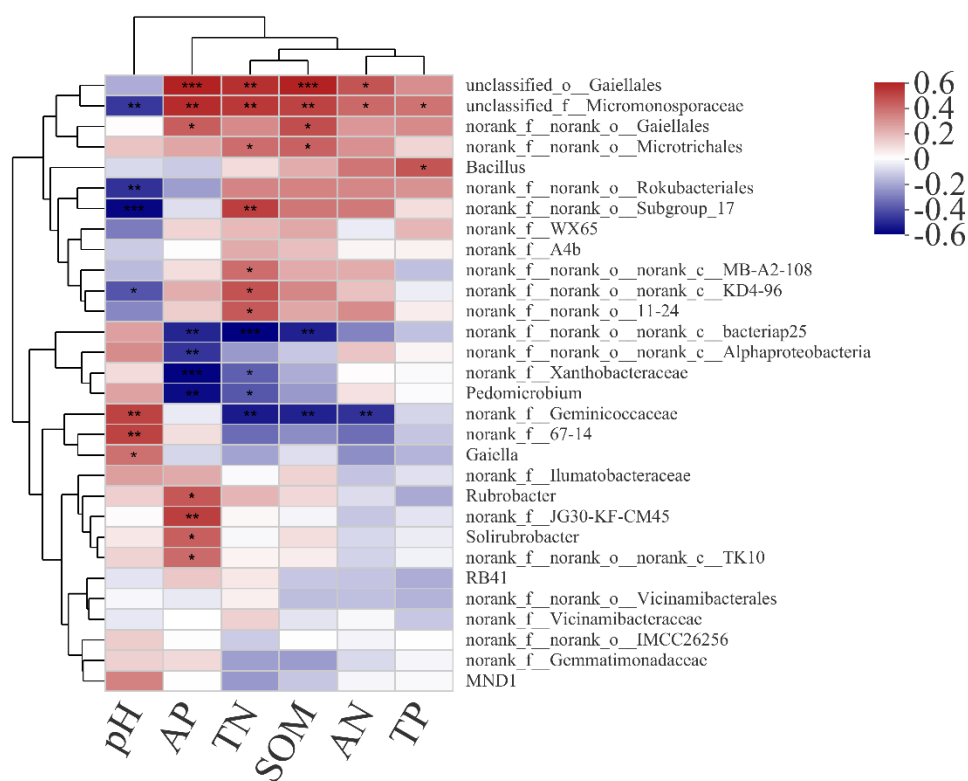

**Figure S1** Correlation between major bacterial communities in soil and soil physicochemical factors in karst plantation vegetation
